# Supplementary material for: Making football safer for women: a systematic review and meta-analysis of injury prevention programmes in 11 773 female football (soccer) players
Source: PubMed Central journal article supplement — Br J Sports Med. 2020 Apr 6;54(18):1089–98. doi: 10.1136/bjsports-2019-101587 (PMC7497572; doi:10.1136/bjsports-2019-101587), 2020-04-06
Supplement: bjsports-2019-101587supp001.pdf [file bjsports-2019-101587supp001.pdf]

## APPENDICES

**Appendix Table 1.** Selection criteria and search terms using the PICOS framework.

| PICOS               | Selection Criteria                                          | Search terms                                                                                                                                                                                                                                                                                                                                                       |
|---------------------|-------------------------------------------------------------|--------------------------------------------------------------------------------------------------------------------------------------------------------------------------------------------------------------------------------------------------------------------------------------------------------------------------------------------------------------------|
| <b>Population</b>   | Female football players of any age and playing at any level | #1 Female OR women OR girls                                                                                                                                                                                                                                                                                                                                        |
|                     |                                                             | #2 Athlete OR sport OR player OR players                                                                                                                                                                                                                                                                                                                           |
| <b>Intervention</b> | Any type of injury prevention program                       | #3 Prevent OR prevention OR preventing OR injury OR injuries OR risk reduction OR program OR programme OR intervention                                                                                                                                                                                                                                             |
|                     |                                                             | #4 neuromuscular OR exercise OR safe OR prophylactic OR FIFA OR balance training OR strength OR proprioceptive OR movement training OR conditioning OR warm-up OR warm up OR therapy OR load OR nutrition OR diet OR sleep OR educate OR education OR advice OR strategy OR strategies OR wellness OR psychological OR cognitive OR bracing OR strapping OR taping |
| <b>Comparison</b>   | Control group with 'usual training' or no intervention      |                                                                                                                                                                                                                                                                                                                                                                    |
| <b>Outcome</b>      | Injury incidence, risk or burden                            | #5 Injury rate OR injury risk OR incidence OR burden OR prevalence                                                                                                                                                                                                                                                                                                 |
| <b>Study Design</b> | Randomised controlled trials                                | #6 Randomised controlled trials OR randomized controlled trials OR RCT OR randomized OR randomised OR controlled trials                                                                                                                                                                                                                                            |

Note: Databases searched as (#1 AND #2) AND (#3 AND #4) AND #5 AND #6. These exact same search terms were used across all databases, with 'all fields' searched for AMED, CINAHL, EMBASE, and SPORTDiscus. The 'title, abstract, keywords' field was searched in Cochrane CENTRAL and Scopus, with the 'title/abstract' field searched in PubMed. The 'title' and 'topic' fields were searched in the core collection database of Web of Science. No other filters/restrictions/limiters (e.g. language, publication type, publication date) were placed on the search in any database. These search terms were not used in the PEDro database, instead three searches in 'clinical trials' were performed using the terms 'athlete injury', 'player injury', and 'sport injury'.

**Appendix Table 2.** Training component definitions for exercise-based interventions.

| Training component | Definition                                                                                                                                                                      |
|--------------------|---------------------------------------------------------------------------------------------------------------------------------------------------------------------------------|
| <i>Agility</i>     | Activities aimed to promote the ability to move, cut, turn, or change direction quickly and effectively, while under control.                                                   |
| <i>Balance</i>     | Activities that involved single- or double-legged stance activities specifically designed to challenge balance and proprioceptive awareness.                                    |
| <i>Mobility</i>    | Included any static or dynamic stretching/mobility activities.                                                                                                                  |
| <i>Plyometric</i>  | Activities that utilised powerful dynamic movements, such as jumping, hopping, landing, or bounding.                                                                            |
| <i>Running</i>     | Any activity that was primarily running in a straight line, may be a warm-up, or warm-down, activity or interspersed with other components of the programme.                    |
| <i>Strength</i>    | Any activity used to improve muscular capacity (either strength or endurance) through the use of resistance, including the use of bodyweight, free weights, bands, or machines. |

Note: agility, balance, mobility, plyometric, and strength components were adapted from previous definitions.<sup>38</sup>

**Appendix Table 3.** Results of the methodological quality assessment using the Cochrane Collaboration Risk of Bias Tool (version 1).

| Article                                  | Selection bias             |                        | Performance bias                       | Detection bias                 | Attrition bias          | Reporting bias      | Other bias |
|------------------------------------------|----------------------------|------------------------|----------------------------------------|--------------------------------|-------------------------|---------------------|------------|
|                                          | Random sequence generation | Allocation concealment | Blinding of participants and personnel | Blinding of outcome assessment | Incomplete outcome data | Selective reporting |            |
| Barber Foss et al. (2018) <sup>49</sup>  | Unclear                    | Low                    | Unclear                                | High                           | Unclear                 | Low                 | Unclear    |
| Emery and Meeuwisse (2010) <sup>50</sup> | Unclear                    | Low                    | Unclear                                | Low                            | Unclear                 | Low                 | Unclear    |
| Espinosa et al. (2015) <sup>51</sup>     | Unclear                    | Unclear                | High                                   | Low                            | Low                     | Low                 | Low        |
| Gilchrist et al. (2008) <sup>52</sup>    | Unclear                    | High                   | High                                   | High                           | High                    | Unclear             | Low        |
| Heidt Jr et al. (2000) <sup>53</sup>     | Unclear                    | High                   | High                                   | Low                            | Unclear                 | High                | Unclear    |
| LaBella et al. (2011) <sup>54</sup>      | Low                        | Low                    | High                                   | High                           | Low                     | Low                 | Low        |
| Rössler et al. (2018) <sup>55</sup>      | Low                        | Low                    | High                                   | High                           | High                    | Low                 | Low        |
| Söderman et al. (2000) <sup>56</sup>     | Unclear                    | Low                    | High                                   | High                           | High                    | Low                 | Unclear    |
| Soligard et al. (2008) <sup>57</sup>     | Unclear                    | Low                    | High                                   | Unclear                        | Unclear                 | Low                 | Low        |
| Steffen et al. (2008) <sup>58</sup>      | Low                        | Low                    | High                                   | Low                            | Low                     | Low                 | Unclear    |
| Waldén et al. (2012) <sup>59</sup>       | Low                        | Low                    | High                                   | Low                            | Unclear                 | Low                 | Low        |
| Zebis et al. (2018) <sup>60</sup>        | Low                        | Low                    | High                                   | Low                            | Low                     | Low                 | Unclear    |

**Random sequence generation:** selection bias due to inadequate generation of a randomised sequence; **Allocation concealment:** selection bias due to inadequate concealment of allocations prior to assignment; **Blinding of participants and personnel:** performance bias due to knowledge of the allocated interventions by participants and personnel during the study; **Blinding of outcome assessment:** detection bias due to knowledge of the allocated interventions by outcome assessors; **Incomplete outcome data:** attrition bias due to amount, nature or handling of incomplete outcome data; **Selective reporting:** reporting bias due to selective outcome reporting; **Other bias:** lack of reporting of or not accounting for poor adherence to the intervention program, or unequal balance of participants in intervention and control groups across different age levels.

**Appendix Table 4.** Summary of adherence to the intervention in each article for the intervention group for all studies.

| Article                                        | Adherence to the intervention                                                                     | Education and resources provided to teams                                                                                                                                            |
|------------------------------------------------|---------------------------------------------------------------------------------------------------|--------------------------------------------------------------------------------------------------------------------------------------------------------------------------------------|
| <b>Barber Foss et al. (2018)<sup>49</sup></b>  | 95% adherence (all sports included)                                                               | Not reported                                                                                                                                                                         |
| <b>Emery and Meeuwisse (2010)<sup>50</sup></b> | Warm-up completed at all practice and games <sup>#</sup>                                          | Physiotherapist taught coaches at baseline and reviewed 3- and 6-weeks later. Provided supplementary written materials                                                               |
| <b>Espinosa et al. (2015)<sup>51</sup></b>     | 80% of training sessions attended                                                                 | Not reported                                                                                                                                                                         |
| <b>Gilchrist et al. (2008)<sup>52</sup></b>    | Average of 25.8 sessions out of 36 (range of 12 to 37)                                            | Teams provided with video and supplemental written materials                                                                                                                         |
| <b>Heidt Jr et al. (2000)<sup>53</sup></b>     | Not reported                                                                                      | Not reported                                                                                                                                                                         |
| <b>LaBella et al. (2011)<sup>54</sup></b>      | Team adherence: 1425 of 1773 practices (80.4%)                                                    | Coaches had 2hr course and received a DVD, laminated card, and printed educational materials.                                                                                        |
| <b>Rössler et al. (2018)<sup>55</sup></b>      | Completed sessions per week ranged from 0.3 to 2.9 (all participants including males and females) | Study assistants visited clubs and gave coaches instruction session, detailed manual, and summary.                                                                                   |
| <b>Söderman et al. (2000)<sup>56</sup></b>     | Average of 65±19 sessions (range of 36 to 97)                                                     | Provided supplementary written materials                                                                                                                                             |
| <b>Soligard et al. (2008)<sup>57</sup></b>     | Average of 44±22 (77%) sessions (range of 11 to 104)                                              | Coaches and team captains had a 3hr course. Coaches and all players received a poster. Coaches received a DVD, exercise book, and small exercise cards. Coaches regularly contacted. |
| <b>Steffen et al. (2008)<sup>58</sup></b>      | Average of 23±9 (52%) sessions (range of 2 to 42)                                                 | All coaches and players received detailed brochure. Instructors visited the teams 3x/week initially, plus a booster after the summer break. Coaches regularly contacted.             |

|                                      |                                                                                                          |                                                                                                      |
|--------------------------------------|----------------------------------------------------------------------------------------------------------|------------------------------------------------------------------------------------------------------|
| Waldén et al. (2012) <sup>59</sup> * | Team adherence: 5244 of 6632 training sessions (79%)                                                     | Coach and player from each team had session with study therapist. Coach received CD-ROM and leaflet. |
| Zebis et al. (2018) <sup>60</sup>    | 93.2% and 84.2% of 159/332 players reported using the football during training and matches respectively. | Not reported                                                                                         |

Note: \*, data retrieved from the secondary analysis of this study published by Hägglund, et al. <sup>105</sup>. #, the authors report that they cannot be certain that all components of the program were completed for all sessions, and the data for the home-based balance program only had <15% of players returning self-report adherence, with a median of 23 sessions (range of 2 to 26).

105. Hägglund M, Atroshi I, Wagner P, et al. Superior compliance with a neuromuscular training programme is associated with fewer ACL injuries and fewer acute knee injuries in female adolescent football players: Secondary analysis of an RCT. Br J Sports Med 2013;47:974-79.

**Appendix Table 5.** Grades of Recommendation, Assessment, Development and Evaluation (GRADE) quality of evidence.

| Meta-analysis outcome                                                         | Number of RCTs | Risk of bias    | Inconsistency   | Indirectness | Imprecision     | Publication bias | GRADE quality |
|-------------------------------------------------------------------------------|----------------|-----------------|-----------------|--------------|-----------------|------------------|---------------|
| <b>Overall injuries</b>                                                       |                |                 |                 |              |                 |                  |               |
| <b>All studies:</b> IRR 0.78, 95%CI 0.64 to 0.95, $I^2 = 60.3\%$              | 11             | -1 <sup>a</sup> | -1 <sup>b</sup> | 0            | 0               | 0                | Low           |
| <b>Multi-component studies:</b> IRR 0.73, 95%CI 0.59 to 0.91, $I^2 = 64.7\%$  | 9              | -1 <sup>a</sup> | -1 <sup>b</sup> | 0            | 0               | 0                |               |
| <b>ACL injuries</b>                                                           |                |                 |                 |              |                 |                  |               |
| <b>All studies:</b> IRR 0.62, 95% CI 0.37 to 1.05, $I^2 = 0\%$                | 6              | -1 <sup>a</sup> | 0               | 0            | -1 <sup>c</sup> | 0                | Low           |
| <b>Multi-component studies:</b> IRR 0.55, 95% CI 0.32 to 0.92, $I^2 = 0\%$    | 5              | -1 <sup>a</sup> | 0               | 0            | -1 <sup>c</sup> | 0                |               |
| <b>Knee injuries</b>                                                          |                |                 |                 |              |                 |                  |               |
| <b>All studies:</b> IRR 0.85, 95% CI 0.67 to 1.09, $I^2 = 21.9\%$             | 10             | -1 <sup>a</sup> | 0               | 0            | -1 <sup>c</sup> | 0                | Low           |
| <b>Multi-component studies:</b> IRR 0.83, 95% CI 0.65 to 1.06, $I^2 = 23.2\%$ | 9              | -1 <sup>a</sup> | 0               | 0            | -1 <sup>c</sup> | 0                |               |
| <b>Ankle injuries</b>                                                         |                |                 |                 |              |                 |                  |               |
| <b>All studies:</b> IRR 0.83, 95% CI 0.65 to 1.07, $I^2 = 13.1\%$             | 8              | -1 <sup>a</sup> | 0               | 0            | -1 <sup>c</sup> | 0                | Low           |
| <b>Multi-component studies:</b> IRR 0.78, 95% CI 0.58 to 1.05, $I^2 = 23.2\%$ | 7              | -1 <sup>a</sup> | 0               | 0            | -1 <sup>c</sup> | 0                |               |
| <b>Hip/groin injuries</b>                                                     |                |                 |                 |              |                 |                  |               |
| <b>All studies:</b> IRR 0.75, 95% CI 0.41 to 1.40, $I^2 = 0\%$                | 5              | -1 <sup>a</sup> | 0               | 0            | -1 <sup>c</sup> | 0                | Low           |
| <b>Multi-component studies:</b> IRR 0.71, 95% CI 0.38 to 1.33, $I^2 = 0\%$    | 4              | -1 <sup>a</sup> | 0               | 0            | -1 <sup>c</sup> | 0                |               |
| <b>Hamstring injuries</b>                                                     |                |                 |                 |              |                 |                  |               |
| <b>All studies:</b> IRR 0.40, 95% CI 0.17 to 0.95, $I^2 = 0\%$                | 4              | -1 <sup>a</sup> | 0               | 0            | -1 <sup>c</sup> | 0                | Low           |
| <b>Multi-component studies:</b> IRR 0.60, 95% CI 0.21 to 1.71, $I^2 = 0\%$    | 2              | -1 <sup>a</sup> | 0               | 0            | -1 <sup>c</sup> | 0                |               |

ACL, anterior cruciate ligament; IRR, injury incidence rate ratio; CI, confidence interval.

<sup>a</sup> Downgraded as the majority of trials scored an overall high risk of bias on the Cochrane Collaboration Risk of Bias Tool.

<sup>b</sup> Downgraded as there was greater than low levels of statistical heterogeneity between studies ( $I^2 > 40\%$ ).

<sup>c</sup> Downgraded as the clinical course of action would differ if the upper versus lower confidence interval represented the truth; or downgraded as the upper and lower confidence intervals had  $>0.5$  difference.

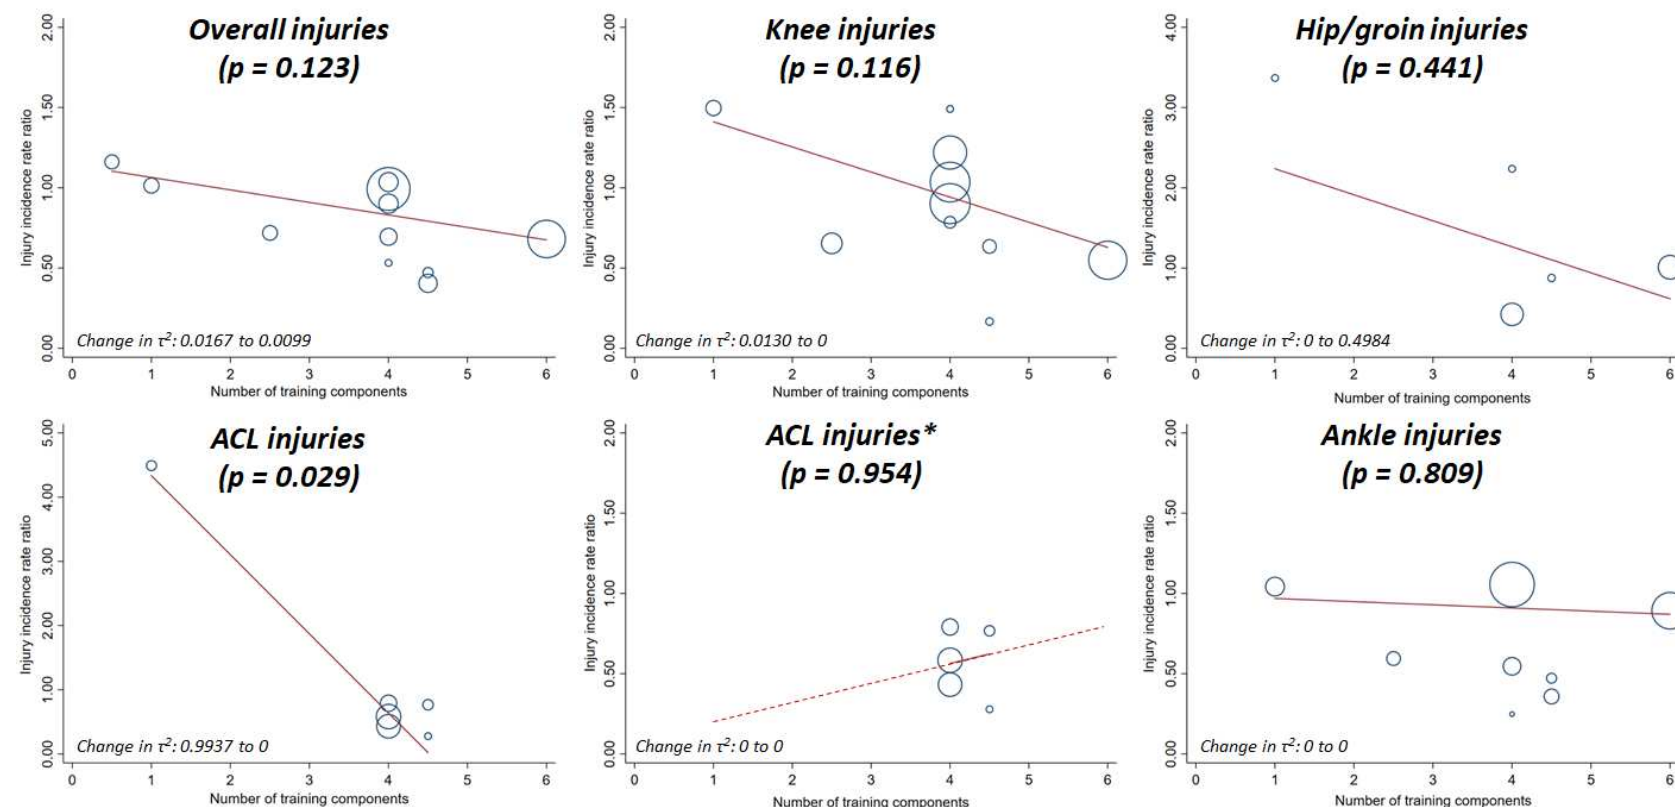

**Appendix Figure 6.** Meta-regressions examining the relationship between the number of exercise-based training components and injury incidence rate ratio.

Note: The size of each bubble is proportional to the weight of each study. A reduction in tau squared ( $\tau^2$ ) may indicate the ability of the covariate (number of training components) to explain the heterogeneity in the injury incidence rate ratio. \*, when removing the study by Söderman, et al.<sup>56</sup> from the ACL injury meta-regression, the relationship became non-significant, indicating this study had a large effect on the relationship, most likely due to the large injury incidence rate ratio of 4.49 that skewed the results of the analysis.

**Appendix Table 7.** Injury incidence for women's football, pooling control group data.

|                  | <b>Injury incidence per 1000 exposure hours - all studies</b> | <b>Injury incidence per 1000 exposure hours - adolescent teams</b> |
|------------------|---------------------------------------------------------------|--------------------------------------------------------------------|
| <b>Overall</b>   | 3.42 (3.19 to 3.67)                                           | 3.39 (3.16 to 3.65)                                                |
| <b>Ankle</b>     | 0.97 (0.85 to 1.11)                                           | 0.95 (0.83 to 1.09)                                                |
| <b>Knee</b>      | 0.57 (0.51 to 0.64)                                           | 0.58 (0.50 to 0.66)                                                |
| <b>Hamstring</b> | 0.22 (0.15 to 0.32)                                           | 0.14 (0.08 to 0.23)                                                |
| <b>Hip/groin</b> | 0.15 (0.10 to 0.21)                                           | 0.15 (0.11 to 0.22)                                                |
| <b>ACL</b>       | 0.12 (0.09 to 0.16)                                           | 0.10 (0.07 to 0.14)                                                |

Note: Data reported as injury incidence per 1000 exposure hours, with the 95% confidence intervals in parentheses. Control group data from Table 3 in the manuscript were used to calculate injury incidence per 1000 exposure hours for studies that reported each injury (e.g. studies by Gilchrist, et al.<sup>52</sup> and Waldén, et al.<sup>59</sup> were not included in the overall incidence as they only reported knee and ACL injuries). Exposure hours were calculated from athletic exposures in four studies (1 athletic exposure equivalent to 2 exposure hours).<sup>49,52-54</sup> Training and match injuries were combined due to a lack of studies reporting these separately. Two studies examined senior teams (which also were the one training component studies) and one study examine college teams (average age >18 years), and were removed from the reporting in the right hand column of adolescent teams (<18 years).<sup>51,52,56</sup>
